# Supplementary material for: Can the Cans: Determinants of Container Deposit Behavior before and after Introduction of a Container Refund Scheme
Source: MDPI journal article supplement (doi:10.3390/bs14020112), 2024-02-02
Supplement: s1 [file s1]

**Supplementary Table S1. Pairwise Comparisons for each construct.**

| Measure   | Time Point Comparison | Mean Difference | SE   | <i>p</i> |
|-----------|-----------------------|-----------------|------|----------|
| Attitude  | 1 -2                  | .047            | .114 | .679     |
|           | 1 -3                  | .106            | .085 | .217     |
|           | 2- 3                  | .058            | .074 | .431     |
| Norm      | 1 -2                  | .175            | .121 | .151     |
|           | 1 -3                  | .150            | .134 | .267     |
|           | 2- 3                  | -.025           | .100 | .804     |
| PBC       | 1 -2                  | .178            | .107 | .100     |
|           | 1 -3                  | .356*           | .108 | .001     |
|           | 2- 3                  | .178*           | .074 | .019     |
| Intention | 1 -2                  | .289*           | .104 | .007     |
|           | 1 -3                  | .336*           | .118 | .005     |
|           | 2- 3                  | .047            | .070 | .499     |
| Behaviour | 1 -2                  | .228            | .128 | .079     |
|           | 1 -3                  | .556*           | .127 | <.001    |
|           | 2- 3                  | .328*           | .122 | .009     |
| Habit     | 1 -2                  | .250            | .147 | .093     |
|           | 1 -3                  | .414*           | .153 | .008     |
|           | 2- 3                  | .164            | .113 | .152     |
